# Supplementary material for: PARP Inhibition Induces Enrichment of DNA Repair–Proficient CD133 and CD117 Positive Ovarian Cancer Stem Cells
Source: Oxford University Press journal article supplement (doi:10.1158/1541-7786.mcr-18-0594), 2018-11-06
Supplement: 15417786mcr180594-sup-203098_2_table_5056003_pfm80y.xlsx [file 15417786mcr180594-sup-203098_2_table_5056003_pfm80y.xlsx]

## Sheet: Table S2
	UWB1.289 WT CD133+ vehicle vs olaparib	p-value
	RAD51	< 0.0001
	RAD51 B	< 0.0001
	RAD51 C	0.0001
	RAD51 D	0.009
	UWB1.289 MUT CD133+ vehicle vs olaparib	p-value
	RAD51	ns
	RAD51 B	0.0001
	RAD51 C	< 0.0001
	RAD51 D	ns
	UWB1.289 WT CD133-CD117- vehicle vs olaparib	p-value
	RAD51	< 0.0001
	RAD51 B	< 0.0001
	RAD51 C	ns
	RAD51 D	ns
	UWB1.289 MUT CD133-CD117- vehicle vs olaparib	p-value
	RAD51	ns
	RAD51 B	0.3
	RAD51 C	ns
	RAD51 D	0.002
