# Supplementary material for: PARP Inhibition Induces Enrichment of DNA Repair–Proficient CD133 and CD117 Positive Ovarian Cancer Stem Cells
Source: Oxford University Press journal article supplement (doi:10.1158/1541-7786.mcr-18-0594), 2018-11-06
Supplement: 15417786mcr180594-sup-203098_2_table_5056004_pfm20y.xlsx [file 15417786mcr180594-sup-203098_2_table_5056004_pfm20y.xlsx]

## Sheet: Table S1
	PROM1 comparisons	p-value
	UWB1.289 WT vehicle vs olaparib	0.008
	UWB1.289 MUT vehicle vs olaparib	0.0004
	PEO1 vehicle vs olaparib	< 0.0001
	OVCAR4 vehicle vs olaparib	< 0.0001
	OVCAR3 vehicle vs olaparib	< 0.0001
	KIT comparisons	p-value
	UWB1.289 WT vehicle vs olaparib	0.003
	UWB1.289 MUT vehicle vs olaparib	< 0.0001
	PEO1 vehicle vs olaparib	< 0.0001
	OVCAR4 vehicle vs olaparib	0.9 (ns)
	OVCAR3 vehicle vs olaparib	< 0.0001
	SOX2 comparisons	p-value
	UWB1.289 WT vehicle vs olaparib	0.2 (ns)
	UWB1.289 MUT vehicle vs olaparib	< 0.0001
	PEO1 vehicle vs olaparib	< 0.0001
	OVCAR4 vehicle vs olaparib	< 0.0001
	OVCAR3 vehicle vs olaparib	< 0.0001
	POU5F1 comparisons	p-value
	UWB1.289 WT vehicle vs olaparib	< 0.0001
	UWB1.289 MUT vehicle vs olaparib	0.5 (ns)
	PEO1 vehicle vs olaparib	0.8 (ns)
	OVCAR4 vehicle vs olaparib	< 0.0001
	OVCAR3 vehicle vs olaparib	< 0.0001
